# Supplementary material for: Aspiration of the dental crown in an elderly patient
Source: PubMed Central journal article supplement — Radiol Case Rep. 2021 Jun 18;16(8):2280–5. doi: 10.1016/j.radcr.2021.05.041 (PMC8233169; doi:10.1016/j.radcr.2021.05.041), 2021-06-18
Supplement: mmc1.pdf [file mmc1.pdf]

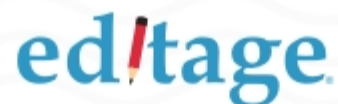

# Editing Certificate

This document certifies that the manuscript listed below has been edited to ensure language and grammar accuracy and is error free in these aspects. The edit was performed by professional editors at Editage, a division of Cactus Communications. The author's core research ideas were not altered in any way during the editing process. The quality of the edit has been guaranteed, with the assumption that our suggested changes have been accepted and the text has not been further altered without the knowledge of our editors.

#### MANUSCRIPT TITLE

**PULMONARY ASPIRATION OF THE DENTAL PROSTHETIC CROWN IN AN ELDERLY PATIENT**

#### AUTHORS

**Francisley Ávila Souza**

#### ISSUED ON

**May 07, 2021**

#### JOB CODE

**LAKAW\_2**

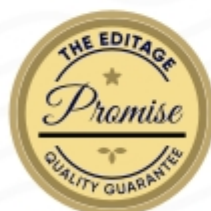

*Vikas Narang*

**Vikas Narang**  
Chief Operating Officer - Editage

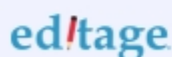

Editage, a brand of Cactus Communications, offers professional English language editing and publication support services to authors engaged in over 1300 areas of research. Through its community of experienced editors, which includes doctors, engineers, published scientists, and researchers with peer review experience, Editage has successfully helped authors get published in internationally reputed journals. Authors who work with Editage are guaranteed excellent language quality and timely delivery.

**GLOBAL :**  
(833) 979-0061 | [request@editage.com](mailto:request@editage.com)

**BRAZIL :**  
08000474773 | [contato@editage.com](mailto:contato@editage.com)

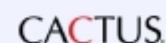

 [impact.science](https://www.impact.science)

 [researcher.life](https://www.researcher.life)

 [lifesciences.cactusglobal.com](https://www.lifesciences.cactusglobal.com)
